# Supplementary material for: Comparison of Trihelix transcription factors between wheat and Brachypodium distachyon at genome-wide
Source: BMC Genomics. 2019 Feb 15;20:142. doi: 10.1186/s12864-019-5494-7 (PMC6377786; doi:10.1186/s12864-019-5494-7)
Supplement: Supplementary file 14 — The promoter regions of TaGT and BdGT genes in different subfamilies. (XLSX 14 kb) [file 12864_2019_5494_MOESM14_ESM.xlsx]

## Sheet: Sheet1
Additional file 14. The promoter regions of TaGT and BdGT genes in different subfamilies.
B. distachyon					Wheat
GT-1	GT-2	SIP1	GTγ	SH4	GT-1	GT-2	SIP1	GTγ	SH4
MYBCORE	CACTFTPPCA1	CACTFTPPCA1	ACGTATERD1	IBOXCORE	SORLIP2AT	SEF4MOTIFGM7S	CACTFTPPCA1	CACTFTPPCA1	CCAATBOX1
SURECOREATSULTR11	DOFCOREZM	DOFCOREZM	RYREPEATBNNAPA	ANAERO2CONSENSUS	CBFHV	PRECONSCRHSP70A	DOFCOREZM	DOFCOREZM	MYB1AT
SORLIP2AT	ARR1AT	ARR1AT	ELRECOREPCRP1	RHERPATEXPA7	LTRECOREATCOR15	CACTFTPPCA1	CAATBOX1	CAATBOX1	MYBST1
POLASIG1	GT1CONSENSUS	GT1CONSENSUS	CACTFTPPCA1	CACTFTPPCA1	INRNTPSADB	DOFCOREZM	ARR1AT	ARR1AT	CACTFTPPCA1
ARFAT	CAATBOX1	CAATBOX1	DOFCOREZM	DOFCOREZM	MYB2CONSENSUSAT	CAATBOX1	EBOXBNNAPA	EBOXBNNAPA	DOFCOREZM
CBFHV	EBOXBNNAPA	EBOXBNNAPA	ARR1AT	ARR1AT	MYBCOREATCYCB1	ARR1AT	MYCCONSENSUSAT	MYCCONSENSUSAT	CAATBOX1
INTRONLOWER	MYCCONSENSUSAT	MYCCONSENSUSAT	GT1CONSENSUS	GT1CONSENSUS	TATABOX5	EBOXBNNAPA	GTGANTG10	GTGANTG10	ARR1AT
CACTFTPPCA1	GATABOX	GATABOX	CAATBOX1	CAATBOX1	RYREPEATBNNAPA	MYCCONSENSUSAT	GATABOX	GATABOX	EBOXBNNAPA
DOFCOREZM	GTGANTG10	GTGANTG10	EBOXBNNAPA	EBOXBNNAPA	SEF3MOTIFGM	GTGANTG10	WRKY71OS	WRKY71OS	MYCCONSENSUSAT
ARR1AT	CURECORECR	CURECORECR	MYCCONSENSUSAT	MYCCONSENSUSAT	CACTFTPPCA1	GATABOX	NODCON2GM	NODCON2GM	GTGANTG10
GT1CONSENSUS			GATABOX	GATABOX	DOFCOREZM	WRKY71OS	OSE2ROOTNODULE	OSE2ROOTNODULE	GATABOX
CAATBOX1			GTGANTG10	GTGANTG10	CAATBOX1	NODCON2GM			WRKY71OS
EBOXBNNAPA			CURECORECR	CURECORECR	ARR1AT	OSE2ROOTNODULE			NODCON2GM
MYCCONSENSUSAT					EBOXBNNAPA				OSE2ROOTNODULE
GATABOX					MYCCONSENSUSAT
GTGANTG10					GTGANTG10
CURECORECR					GATABOX
					WRKY71OS
					NODCON2GM
					OSE2ROOTNODULE
