# Supplementary material for: Comparison of Trihelix transcription factors between wheat and Brachypodium distachyon at genome-wide
Source: BMC Genomics. 2019 Feb 15;20:142. doi: 10.1186/s12864-019-5494-7 (PMC6377786; doi:10.1186/s12864-019-5494-7)
Supplement: Supplementary file 23 — Orthologous Trihelix gene pairs between wheat and Zea mays. (XLSX 17 kb) [file 12864_2019_5494_MOESM23_ESM.xlsx]

## Sheet: Sheet1
Additional file 23. Orthologous Trihelix gene pairs between wheat and Zea mays.
Gene ID	Chromosome	Genomic location		Gene ID	Chromosome	Genomic location		Ka/Ks
		Start	End			Start	End
TaGT1-A	1A	558954529	558955590	GRMZM2G080583	5	179111776	179112984	0.350302
TaGT1-A	1A	558954529	558955590	GRMZM2G157219	6	168355867	168363809	0.238772
TaGT1-A	1A	558954529	558955590	GRMZM2G163157	8	154708397	154709885	0.348737
TaGT4-A	1A	382252188	382253147	GRMZM2G428470	B73V4_ctg182	952419	954409	0.167789
TaGT4-B	1B	412243057	412244010	GRMZM2G428470	B73V4_ctg182	952419	954409	0.15918
TaGT5-A	1A	317811200	317814470	GRMZM2G414159	5	22609641	22613891	0.345784
TaGT6-B	1B	84979983	84980951	GRMZM2G016637	6	27100536	27102340	0.42651
TaGT7-D	1D	305228756	305229974	GRMZM2G428470	B73V4_ctg182	952419	954409	0.185113
TaGT8-A	2A	537682707	537683957	GRMZM2G380094	5	179111776	179112984	0.472795
TaGT8-B	2B	475126694	475127944	GRMZM2G380094	5	179111776	179112984	0.427238
TaGT8-D	2D	401113182	401114423	GRMZM2G380094	5	179111776	179112984	0.443856
TaGT12-A	2A	490662152	490665462	GRMZM2G084684	5	169748033	169752141	0.262706
TaGT13-A	2A	637678058	637681260	GRMZM2G063203	4	153362895	153366609	0.508801
TaGT13-A	2A	637678058	637681260	GRMZM2G169580	5	195392064	195395774	0.444772
TaGT13-B	2B	578136636	578139812	GRMZM2G063203	4	153362895	153366609	0.487334
TaGT13-B	2B	578136636	578139812	GRMZM2G169580	5	195392064	195395774	0.433185
TaGT16-D	2D	492508841	492512011	GRMZM2G063203	4	153362895	153366609	0.537057
TaGT16-D	2D	492508841	492512011	GRMZM2G169580	5	195392064	195395774	0.458484
TaGT18-A	3A	500526281	500527298	GRMZM2G157219	6	168355867	168363809	0.347997
TaGT18-A	3A	500526281	500527298	GRMZM2G163157	8	154708397	154709885	0.181544
TaGT18-B	3B	489980323	489981338	GRMZM2G157219	6	168355867	168363809	0.273957
TaGT18-B	3B	489980323	489981338	GRMZM2G163157	8	154708397	154709885	0.191751
TaGT18-D	3D	375722382	375723338	GRMZM2G157219	6	168355867	168363809	0.320078
TaGT18-D	3D	375722382	375723338	GRMZM2G163157	8	154708397	154709885	0.185289
TaGT19-B	3B	443371712	443372650	GRMZM2G339957	8	160091655	160095169	0.388845
TaGT19-D	3D	343449753	343454679	GRMZM2G339957	8	160091655	160095169	0.383579
TaGT28-B	4B	671630765	671634023	GRMZM2G414159	5	22609641	22613891	0.46948
TaGT32-B	5B	541916322	541918520	GRMZM2G375307	7	150661824	150666202	0.251748
TaGT32-D	5D	444888032	444890209	GRMZM2G375307	7	150661824	150666202	0.258826
